# Supplementary material for: FastTrack: An open-source software for tracking varying numbers of deformable objects
Source: PubMed Central journal article supplement (PMC7904165; doi:10.1371/journal.pcbi.1008697), 2021-02-11
Supplement: pcbi.1008697.s002.pdf [file pcbi.1008697.s002.pdf]

**S2 Table. User-defined parameters (v5.1.7)**

| Category                   | Name                               | CLI option name         | Range                   | Unit                                                                                                                        | Description                                                                                                                                                               |
|----------------------------|------------------------------------|-------------------------|-------------------------|-----------------------------------------------------------------------------------------------------------------------------|---------------------------------------------------------------------------------------------------------------------------------------------------------------------------|
| Filesystem                 | Images path                        | --path                  | -                       | -                                                                                                                           | Path to the folder where the images are stored                                                                                                                            |
|                            | Background path                    | --backPath              | -                       | -                                                                                                                           | Path to a background image (optional)                                                                                                                                     |
|                            | Configuration file                 | --cfg                   | -                       | -                                                                                                                           | Path to a configuration file (optional)                                                                                                                                   |
| Detection                  | ROI bottom x                       | --xBottom               | 0 ; image width-1       | pixel                                                                                                                       | Bottom corner x-coordinate of the region of interest. Set to 0 to avoid cropping the image.                                                                               |
|                            | ROI bottom y                       | --yBottom               | 0 ; image height-1      | pixel                                                                                                                       | Bottom corner y-coordinate of the region of interest. Set to 0 to avoid cropping the image.                                                                               |
|                            | ROI top x                          | --xTop                  | 0 ; ROI xBottom-1       | pixel                                                                                                                       | Top corner x-coordinate of the region of interest. Set to 0 to avoid cropping the image.                                                                                  |
|                            | ROI top y                          | --yTop                  | 0 ; ROI yBottom-1       | pixel                                                                                                                       | Top corner y-coordinate of the region of interest. Set to 0 to avoid cropping the image.                                                                                  |
|                            | Registration method                | --reg                   | 0 ; 3                   | -                                                                                                                           | Registration method, 0: None, 1: Simple, 2: ECC, 3: Features                                                                                                              |
|                            | Registration method for background | --regBack               | 0 ; 3                   | -                                                                                                                           | Registration method to compute the background. 0: None, 1: Simple, 2: ECC, 3: Features                                                                                    |
|                            | Background method                  | --methBack              | 0 ; 2                   | -                                                                                                                           | Method to compute the background. 0: min, 1: max, 2: average                                                                                                              |
|                            | Number of images for background    | --nBack                 | 1 ; n <sub>images</sub> | frame                                                                                                                       | Number of images to compute the background                                                                                                                                |
|                            | Morphological operation            | --morph                 | 0 ; 8                   | -                                                                                                                           | Morphological operation, 0: None, 1: Erode, 2: Dilate, 3: Open, 4: Close, 5: Gradient, 6: TopHat, 7: BlackHat, 8: HitMiss                                                 |
|                            | Kernel size                        | --morphSize             | 1 ; image size          | pixel                                                                                                                       | Size of the kernel used in the morphological operation. It can be omitted if no operation is performed                                                                    |
|                            | Kernel type                        | --morphType             | 0 ; 2                   | -                                                                                                                           | Type of the kernel used in the morphological operation, can be omitted if no operation are performed, 0: Rect, 1: Cross, 2: Ellipse                                       |
|                            | Threshold                          | --thresh                | 1 ; Inf                 | intensity                                                                                                                   | Threshold for the binarization. If Light background is set to 0 (resp. 1), pixels with values less (resp. more) than Threshold will be detected as belonging to an object |
|                            | Light background                   | --lightBack             | 0 ; 1                   | -                                                                                                                           | Boolean value indicatting if the background is lighter or darker than the objects to track. 0: background is lighter, 1: background is darker                             |
| Minimum area               | --minArea                          | 1 ; Image area          | pixel                   | Minimal area of the objects to track                                                                                        |                                                                                                                                                                           |
| Maximum area               | --maxArea                          | 1 ; Image area          | pixel                   | Maximal area of the objects to track                                                                                        |                                                                                                                                                                           |
| Tracking                   | Object part                        | --spot                  | 0 ; 2                   | -                                                                                                                           | Part of the object used for the matching. 0: head, 1: tail, 2: whole object                                                                                               |
|                            | Distance normalization             | --normDist              | 0° ; ∞                  | pixel                                                                                                                       | Normalization factor for distances                                                                                                                                        |
|                            | Angular normalization              | --normAngle             | 0° ; ∞                  | degrees                                                                                                                     | Normalization factor for orientation increments                                                                                                                           |
|                            | Area normalization                 | --normArea              | 0° ; ∞                  | pixel                                                                                                                       | Normalization factor for area increments                                                                                                                                  |
|                            | Perimeter normalization            | --normPerim             | 0° ; ∞                  | pixel                                                                                                                       | Normalization factor for perimeter increments                                                                                                                             |
|                            | Maximal distance                   | --maxDist               | 1 ; image size          | pixel                                                                                                                       | Maximal distance for the matching. If an object travels more than this distance, it is not tracked and a new object is created                                            |
| Maximal disappearance time | --maxTime                          | 1 ; n <sub>images</sub> | frame                   | Maximal time for the tracking. If an object disappears longer than this time, it is not tracked and a new object is created |                                                                                                                                                                           |
