# Supplementary material for: FastTrack: An open-source software for tracking varying numbers of deformable objects
Source: PLoS Comput Biol. 2021 Feb 11;17(2):e1008697. doi: 10.1371/journal.pcbi.1008697 (PMC7904165; doi:10.1371/journal.pcbi.1008697)
Supplement: S1 Data — (XLSX) [file pcbi.1008697.s012.xlsx]

## Sheet: Fig 2
dataset	"method"	"mean_time"	"mean_std"	"mean_rmsd"	"std_rmds"
DRO_001	"correlation"	0.0159	0.0005	0.72	0.07
DRO_001	"ecc"	0.3471	0.0005	0.66	0.06
DRO_001	"fb"	0.0088	0.0001	0.76	0.08
DRO_001	"none"	0	0	1	0
ULT_001	"correlation"	0.00338	9e-05	0.93	0.1
ULT_001	"ecc"	0.119	0.0008	0.9	0.1
ULT_001	"fb"	0.0016	9e-05	0.82	0.12
ULT_001	"none"	0	0	1	0

## Sheet: Fig 3B
rho	p_inc	pdf(tau=1)	pdf(tau=10)	pdf(tau=100)
0	0	0.97874	0.00680909	5.79006e-05
0.0251256	0	18.8427	0.0881887	0.00043542
0.0502513	0	12.7866	0.278558	0.000696537
0.0753769	0	4.32642	0.661821	0.00102102
0.100503	0	1.02997	1.31117	0.00177164
0.125628	0	0.258033	2.31215	0.00170944
0.150754	0	0.0817016	3.53955	0.00165426
0.175879	0	0.0264533	4.65155	0.00175479
0.201005	0	0.00733925	5.27858	0.0017269
0.226131	0	0.00340547	5.29945	0.00191944
0.251256	0	0.00103179	4.85555	0.00172965
0.276382	0	0.00110406	4.0316	0.00163061
0.301508	0	5.075e-07	2.95617	0.00160418
0.326633	0	7.59708e-05	1.9063	0.00146076
0.351759	0	0.000256081	1.10697	0.00140728
0.376884	0	0.000211934	0.599244	0.00140071
0.40201	0	0.000270915	0.334371	0.00117311
0.427136	0.000101382	0.000738097	0.194544	0.00136131
0.452261	0.00789759	0.000607368	0.125425	0.00139804
0.477387	0.211893	0.000141362	0.0812786	0.00132238
0.502513	0.554771	1.02735e-09	0.0572028	0.00117798
0.527638	0.784347	1.89945e-39	0.0410251	0.00130729
0.552764	0.920367	2.30448e-205	0.0293113	0.00134128
0.577889	0.953616	0	0.0203028	0.00130868
0.603015	0.962956	0	0.0147526	0.00143344
0.628141	0.9678	0	0.0113252	0.00147105
0.653266	0.970836	0	0.00665039	0.00168979
0.678392	0.972899	0	0.00536435	0.00215041
0.703518	0.974332	0	0.00424019	0.00193913
0.728643	0.975537	0	0.00346136	0.00225349
0.753769	0.976604	0	0.00202533	0.00275957
0.778894	0.977543	0	0.00195085	0.00297196
0.80402	0.978381	0	0.00093231	0.00340519
0.829146	0.979183	0	0.00103473	0.00405373
0.854271	0.979875	0	0.000610733	0.00421299
0.879397	0.980502	0	0.00055988	0.00515569
0.904523	0.98108	0	0.000471766	0.00532534
0.929648	0.981618	0	0.000181291	0.00545492
0.954774	0.98212	0	0.000144679	0.0059356
0.979899	0.982596	0	0.000195426	0.00737168
1.00503	0.983046	0	7.60919e-05	0.00809463
1.03015	0.983473	0	9.85891e-06	0.0078602
1.05528	0.983867	0	1.90521e-09	0.00779936
1.0804	0.98425	0	0.000133376	0.00903587
1.10553	0.984618	0	3.44946e-07	0.0102806
1.13065	0.984956	0	7.41114e-05	0.0105814
1.15578	0.985285	0	4.19353e-10	0.0125499
1.1809	0.985587	0	6.23505e-27	0.0143365
1.20603	0.985896	0	2.43593e-55	0.0171254
1.23116	0.986169	0	2.50067e-95	0.0204179
1.25628	0.986451	0	6.7455e-147	0.0245199
1.28141	0.986702	0	4.7812e-210	0.0285435
1.30653	0.986965	0	8.90481e-285	0.0337621
1.33166	0.987189	0	0	0.0413644
1.35678	0.987435	0	0	0.051177
1.38191	0.987644	0	0	0.0600052
1.40704	0.987854	0	0	0.0669699
1.43216	0.988074	0	0	0.0732274
1.45729	0.988254	0	0	0.075599
1.48241	0.988451	0	0	0.0787474
1.50754	0.988644	0	0	0.0883044
1.53266	0.988807	0	0	0.101597
1.55779	0.988976	0	0	0.121747
1.58291	0.989156	0	0	0.132849
1.60804	0.989303	0	0	0.142206
1.63317	0.989457	0	0	0.163331
1.65829	0.989617	0	0	0.187103
1.68342	0.989763	0	0	0.22072
1.70854	0.989895	0	0	0.273592
1.73367	0.99003	0	0	0.349655
1.75879	0.99017	0	0	0.430809
1.78392	0.990302	0	0	0.471689
1.80905	0.990424	0	0	0.459515
1.83417	0.99054	0	0	0.421691
1.8593	0.990653	0	0	0.414723
1.88442	0.99078	0	0	0.436299
1.90955	0.990891	0	0	0.482949
1.93467	0.990998	0	0	0.566699
1.9598	0.9911	0	0	0.673737
1.98492	0.991203	0	0	0.790327
2.01005	0.991304	0	0	0.913878
2.03518	0.991405	0	0	1.05661
2.0603	0.991499	0	0	1.23072
2.08543	0.99159	0	0	1.41205
2.11055	0.991677	0	0	1.55869
2.13568	0.991771	0	0	1.69282
2.1608	0.991856	0	0	1.85106
2.18593	0.991942	0	0	1.99693
2.21106	0.992027	0	0	2.08994
2.23618	0.992107	0	0	2.11967
2.26131	0.992179	0	0	2.09041
2.28643	0.992253	0	0	2.02024
2.31156	0.992333	0	0	1.87905
2.33668	0.992406	0	0	1.72145
2.36181	0.99248	0	0	1.53953
2.38693	0.992552	0	0	1.32789
2.41206	0.992621	0	0	1.12332
2.43719	0.992688	0	0	0.923919
2.46231	0.992751	0	0	0.735836
2.48744	0.992814	0	0	0.585974
2.51256	0.992879	0	0	0.452022
2.53769	0.992944	0	0	0.331552
2.56281	0.993002	0	0	0.224927
2.58794	0.993066	0	0	0.149895
2.61307	0.993124	0	0	0.106443
2.63819	0.993185	0	0	0.0839098
2.66332	0.993236	0	0	0.0703639
2.68844	0.99329	0	0	0.0632322
2.71357	0.99334	0	0	0.0608372
2.73869	0.993394	0	0	0.0575682
2.76382	0.993448	0	0	0.0523854
2.78894	0.993501	0	0	0.0507309
2.81407	0.993551	0	0	0.0484971
2.8392	0.993602	0	0	0.0436112
2.86432	0.993653	0	0	0.0405514
2.88945	0.993698	0	0	0.039119
2.91457	0.993749	0	0	0.0356286
2.9397	0.99379	0	0	0.0333024
2.96482	0.993834	0	0	0.0293765
2.98995	0.993878	0	0	0.0253987
3.01508	0.993921	0	0	0.0223158
3.0402	0.993962	0	0	0.019102
3.06533	0.994004	0	0	0.0178089
3.09045	0.994051	0	0	0.0162099
3.11558	0.994093	0	0	0.0158628
3.1407	0.99413	0	0	0.0162654
3.16583	0.994172	0	0	0.0158274
3.19095	0.994212	0	0	0.0158295
3.21608	0.994248	0	0	0.0137978
3.24121	0.994287	0	0	0.0116118
3.26633	0.994326	0	0	0.00932075
3.29146	0.994361	0	0	0.00925684
3.31658	0.994393	0	0	0.00917853
3.34171	0.994427	0	0	0.00810934
3.36683	0.994464	0	0	0.00684229
3.39196	0.994498	0	0	0.0067701
3.41709	0.994528	0	0	0.00660925
3.44221	0.994565	0	0	0.00597604
3.46734	0.994596	0	0	0.0058573
3.49246	0.994634	0	0	0.00460905
3.51759	0.994666	0	0	0.00394614
3.54271	0.994696	0	0	0.0030652
3.56784	0.99473	0	0	0.00275183
3.59296	0.994759	0	0	0.00230152
3.61809	0.994789	0	0	0.00195981
3.64322	0.994817	0	0	0.00168155
3.66834	0.994849	0	0	0.00138316
3.69347	0.99488	0	0	0.000745178
3.71859	0.994907	0	0	0.000457968
3.74372	0.994935	0	0	0.000293398
3.76884	0.99496	0	0	0.000270045
3.79397	0.994981	0	0	0.000254835
3.8191	0.995013	0	0	0.000115357
3.84422	0.995042	0	0	8.48624e-05
3.86935	0.995068	0	0	6.74026e-05
3.89447	0.995089	0	0	7.03748e-05
3.9196	0.995115	0	0	0.0001412
3.94472	0.995142	0	0	2.8592e-05
3.96985	0.995166	0	0	2.50875e-07
3.99497	0.995193	0	0	4.42506e-11
4.0201	0.995218	0	0	4.38158e-16
4.04523	0.995245	0	0	1.26147e-22
4.07035	0.995267	0	0	1.05598e-30
4.09548	0.995292	0	0	2.57021e-40
4.1206	0.995316	0	0	1.81892e-51
4.14573	0.99534	0	0	3.74278e-64
4.17085	0.99536	0	0	2.23927e-78
4.19598	0.99538	0	0	3.89541e-94
4.22111	0.995402	0	0	1.9703e-111
4.24623	0.99543	0	0	2.89765e-130
4.27136	0.995454	0	0	1.23906e-150
4.29648	0.995474	0	0	1.54054e-172
4.32161	0.995494	0	0	5.56912e-196
4.34673	0.995513	0	0	5.85375e-221
4.37186	0.995532	0	0	1.78902e-247
4.39698	0.995549	0	0	1.58975e-275
4.42211	0.995566	0	0	4.10748e-305
4.44724	0.995587	0	0	0
4.47236	0.995608	0	0	0
4.49749	0.995627	0	0	0
4.52261	0.995646	0	0	0
4.54774	0.995667	0	0	0
4.57286	0.995684	0	0	0
4.59799	0.995704	0	0	0
4.62312	0.995721	0	0	0
4.64824	0.995741	0	0	0
4.67337	0.995759	0	0	0
4.69849	0.995777	0	0	0
4.72362	0.995796	0	0	0
4.74874	0.995811	0	0	0
4.77387	0.995831	0	0	0
4.79899	0.995847	0	0	0
4.82412	0.995865	0	0	0
4.84925	0.995881	0	0	0
4.87437	0.9959	0	0	0
4.8995	0.995918	0	0	0
4.92462	0.99593	0	0	0
4.94975	0.995944	0	0	0
4.97487	0.995961	0	0	0
5	0.99598	0	0	0
5.02513	0.99598	0	0	0
5.05025	0.99598	0	0	0
5.07538	0.99598	0	0	0
5.1005	0.99598	0	0	0
5.12563	0.99598	0	0	0
5.15075	0.99598	0	0	0
5.17588	0.99598	0	0	0
5.20101	0.99598	0	0	0
5.22613	0.99598	0	0	0
5.25126	0.99598	0	0	0
5.27638	0.99598	0	0	0
5.30151	0.99598	0	0	0
5.32663	0.99598	0	0	0
5.35176	0.99598	0	0	0
5.37688	0.99598	0	0	0
5.40201	0.99598	0	0	0
5.42714	0.99598	0	0	0
5.45226	0.99598	0	0	0
5.47739	0.99598	0	0	0
5.50251	0.99598	0	0	0
5.52764	0.99598	0	0	0
5.55276	0.99598	0	0	0
5.57789	0.99598	0	0	0
5.60302	0.99598	0	0	0
5.62814	0.99598	0	0	0
5.65327	0.99598	0	0	0
5.67839	0.99598	0	0	0
5.70352	0.99598	0	0	0
5.72864	0.99598	0	0	0
5.75377	0.99598	0	0	0
5.77889	0.99598	0	0	0
5.80402	0.99598	0	0	0
5.82915	0.99598	0	0	0
5.85427	0.99598	0	0	0
5.8794	0.99598	0	0	0
5.90452	0.99598	0	0	0
5.92965	0.99598	0	0	0
5.95477	0.99598	0	0	0
5.9799	0.99598	0	0	0
6.00503	0.99598	0	0	0
6.03015	0.99598	0	0	0
6.05528	0.99598	0	0	0
6.0804	0.99598	0	0	0
6.10553	0.99598	0	0	0
6.13065	0.99598	0	0	0
6.15578	0.99598	0	0	0
6.1809	0.99598	0	0	0
6.20603	0.99598	0	0	0
6.23116	0.99598	0	0	0
6.25628	0.99598	0	0	0
6.28141	0.99598	0	0	0
6.30653	0.99598	0	0	0
6.33166	0.99598	0	0	0
6.35678	0.99598	0	0	0
6.38191	0.99598	0	0	0
6.40704	0.99598	0	0	0
6.43216	0.99598	0	0	0
6.45729	0.99598	0	0	0
6.48241	0.99598	0	0	0
6.50754	0.99598	0	0	0
6.53266	0.99598	0	0	0
6.55779	0.99598	0	0	0
6.58291	0.99598	0	0	0
6.60804	0.99598	0	0	0
6.63317	0.99598	0	0	0
6.65829	0.99598	0	0	0
6.68342	0.99598	0	0	0
6.70854	0.99598	0	0	0
6.73367	0.99598	0	0	0
6.75879	0.99598	0	0	0
6.78392	0.99598	0	0	0
6.80905	0.99598	0	0	0
6.83417	0.99598	0	0	0
6.8593	0.99598	0	0	0
6.88442	0.99598	0	0	0
6.90955	0.99598	0	0	0
6.93467	0.99598	0	0	0
6.9598	0.99598	0	0	0
6.98492	0.99598	0	0	0
7.01005	0.99598	0	0	0
7.03518	0.99598	0	0	0
7.0603	0.99598	0	0	0
7.08543	0.99598	0	0	0
7.11055	0.99598	0	0	0
7.13568	0.99598	0	0	0
7.1608	0.99598	0	0	0
7.18593	0.99598	0	0	0
7.21106	0.99598	0	0	0
7.23618	0.99598	0	0	0
7.26131	0.99598	0	0	0
7.28643	0.99598	0	0	0
7.31156	0.99598	0	0	0
7.33668	0.99598	0	0	0
7.36181	0.99598	0	0	0
7.38693	0.99598	0	0	0
7.41206	0.99598	0	0	0
7.43719	0.99598	0	0	0
7.46231	0.99598	0	0	0
7.48744	0.99598	0	0	0
7.51256	0.99598	0	0	0
7.53769	0.99598	0	0	0
7.56281	0.99598	0	0	0
7.58794	0.99598	0	0	0
7.61307	0.99598	0	0	0
7.63819	0.99598	0	0	0
7.66332	0.99598	0	0	0
7.68844	0.99598	0	0	0
7.71357	0.99598	0	0	0
7.73869	0.99598	0	0	0
7.76382	0.99598	0	0	0
7.78894	0.99598	0	0	0
7.81407	0.99598	0	0	0
7.8392	0.99598	0	0	0
7.86432	0.99598	0	0	0
7.88945	0.99598	0	0	0
7.91457	0.99598	0	0	0
7.9397	0.99598	0	0	0
7.96482	0.99598	0	0	0
7.98995	0.99598	0	0	0
8.01508	0.99598	0	0	0
8.0402	0.99598	0	0	0
8.06533	0.99598	0	0	0
8.09045	0.99598	0	0	0
8.11558	0.99598	0	0	0
8.1407	0.99598	0	0	0
8.16583	0.99598	0	0	0
8.19095	0.99598	0	0	0
8.21608	0.99598	0	0	0
8.24121	0.99598	0	0	0
8.26633	0.99598	0	0	0
8.29146	0.99598	0	0	0
8.31658	0.99598	0	0	0
8.34171	0.99598	0	0	0
8.36683	0.99598	0	0	0
8.39196	0.99598	0	0	0
8.41709	0.99598	0	0	0
8.44221	0.99598	0	0	0
8.46734	0.99598	0	0	0
8.49246	0.99598	0	0	0
8.51759	0.99598	0	0	0
8.54271	0.99598	0	0	0
8.56784	0.99598	0	0	0
8.59296	0.99598	0	0	0
8.61809	0.99598	0	0	0
8.64322	0.99598	0	0	0
8.66834	0.99598	0	0	0
8.69347	0.99598	0	0	0
8.71859	0.99598	0	0	0
8.74372	0.99598	0	0	0
8.76884	0.99598	0	0	0
8.79397	0.99598	0	0	0
8.8191	0.99598	0	0	0
8.84422	0.99598	0	0	0
8.86935	0.99598	0	0	0
8.89447	0.99598	0	0	0
8.9196	0.99598	0	0	0
8.94472	0.99598	0	0	0
8.96985	0.99598	0	0	0
8.99497	0.99598	0	0	0
9.0201	0.99598	0	0	0
9.04523	0.99598	0	0	0
9.07035	0.99598	0	0	0
9.09548	0.99598	0	0	0
9.1206	0.99598	0	0	0
9.14573	0.99598	0	0	0
9.17085	0.99598	0	0	0
9.19598	0.99598	0	0	0
9.22111	0.99598	0	0	0
9.24623	0.99598	0	0	0
9.27136	0.99598	0	0	0
9.29648	0.99598	0	0	0
9.32161	0.99598	0	0	0
9.34673	0.99598	0	0	0
9.37186	0.99598	0	0	0
9.39698	0.99598	0	0	0
9.42211	0.99598	0	0	0
9.44724	0.99598	0	0	0
9.47236	0.99598	0	0	0
9.49749	0.99598	0	0	0
9.52261	0.99598	0	0	0
9.54774	0.99598	0	0	0
9.57286	0.99598	0	0	0
9.59799	0.99598	0	0	0
9.62312	0.99598	0	0	0
9.64824	0.99598	0	0	0
9.67337	0.99598	0	0	0
9.69849	0.99598	0	0	0
9.72362	0.99598	0	0	0
9.74874	0.99598	0	0	0
9.77387	0.99598	0	0	0
9.79899	0.99598	0	0	0
9.82412	0.99598	0	0	0
9.84925	0.99598	0	0	0
9.87437	0.99598	0	0	0
9.8995	0.99598	0	0	0
9.92462	0.99598	0	0	0
9.94975	0.99598	0	0	0
9.97487	0.99598	0	0	0
10	0.99598	0	0	0

## Sheet: Fig 3CD Pinc
tau	ACT_001	ACT_002	ACT_003	ACT_004	ART_001	BAC_001	BLS_001	DRO_001	DRO_002	DRO_003	DRO_004	DRP_001	DRP_002	DRP_003	DRP_004	DRP_005	GRA_001	GRA_002	GRA_003	IND_001	IND_002	MED_001	MIC_001	PAR_001	ROT_001	SOC_001	TIS_001	TIS_002	TRA_001	ULT_001	ULT_002	ZFA_001	ZFA_002	ZFA_003	ZFA_004	ZFJ_001	ZFL_002	ZFL_003	ZFL_004
0.1	0	0	0	8.86098e-06	1.19703e-237	0	0	0	0	0	0	0	0	0	0	0	0	0	2.80011e-41	0	0	0	0	0	0	0	0	0	0	0	0	0	0	0	0	0	0	1.82241e-61	0
0.120679	0	0	3.1302e-07	5.68329e-06	1.22804e-67	0	0	0	0	0	0	0	0	0	0	0	0	0	0	0	0	0	0	0	0	0	0	0	0	0	0	0	0	0	0	0	0	8.26334e-09	0
0.145635	0	0	1.9879e-06	8.47695e-05	1.08642e-09	0	0	0	0	0	0	0	0	0	0	0	0	0	1.48647e-07	0	0	0	0	2.2959e-277	0	0	0	0	3.79419e-18	0	0	0	0	0	0	0	0	4.1626e-08	8.33938e-248
0.175751	0	0	1.31839e-05	0.000333798	1.27012e-18	0	0	0	7.01902e-234	0	0	0	0	0	0	0	0	0	9.46372e-05	0	0	0	0	4.91494e-113	1.15745e-40	0	0	0	1.16816e-08	0	0	0	0	0	0	1.29676e-222	0	3.76484e-05	0
0.212095	0	0	0.000111367	0.000439682	1.8581e-07	1.11312e-189	0	0	2.68757e-144	0	0	0	0	0	0	0	0	0	9.13586e-11	0	0	0	0	3.27157e-34	0	0	0	0	1.43904e-108	0	0	0	0	1.29556e-299	0	1.55712e-84	0	5.57846e-05	0
0.255955	0	0	0.000137905	0.00074182	3.45732e-07	1.59294e-101	0	0	2.40311e-87	0	0	0	0	0	0	0	0	0	3.63411e-05	0	0	0	0	3.24508e-08	1.00528e-08	5.30828e-77	0	0	0	0	0	0	0	3.89374e-29	0	2.30046e-22	0	7.78712e-06	0
0.308884	0	0	0.000253774	0.00113783	1.92221e-06	1.53201e-50	0	0	5.04447e-52	0	0	0	0	0	0	0	0	0	6.78429e-05	0	0	0	0	8.9716e-07	1.88868e-176	7.57533e-24	1.96401e-61	2.32534e-36	0	0	0	1.38589e-173	0	6.18384e-37	0	2.00656e-06	0	0.000126141	0
0.372759	0	0	0.000298544	0.00130519	1.20291e-05	1.88665e-23	0	0	6.56199e-31	0	0	0	0	0	0	0	0	0	9.57045e-05	0	0	3.70382e-245	0	1.2083e-06	5.34495e-186	1.18442e-06	4.29558e-09	3.64354e-08	9.12239e-07	0	0	5.49358e-08	0	2.14825e-07	0	2.57253e-07	0	0.000117553	3.42658e-08
0.449843	0	0	0.00038948	0.00166242	5.1193e-05	7.35821e-10	7.03891e-185	0	5.11834e-19	0	0	0	0	1.37232e-81	0	0	0	0	9.09165e-05	0	0	1.37889e-76	0	1.49967e-05	1.69417e-83	1.75297e-06	2.5231e-07	1.70942e-07	1.49577e-109	1.94095e-293	0	1.53553e-07	0	1.88219e-09	0	1.17707e-05	0	0.00021298	8.81867e-09
0.542868	0	0	0.000544626	0.00225979	8.15912e-05	4.22087e-06	0	0	5.64153e-13	0	1.27544e-119	0	0	2.55833e-186	0	0	0	0	8.89537e-05	0	3.56096e-07	1.43092e-12	0	6.9483e-05	6.78839e-09	2.07534e-05	1.91006e-06	3.46783e-06	7.06166e-07	1.93503e-134	0	2.28808e-06	0	2.9104e-07	5.93166e-285	7.24721e-06	0	0.000555165	1.37782e-08
0.655129	5.45427e-106	0	0.000736533	0.00345563	8.57276e-05	6.4719e-05	3.15114e-37	0	8.88188e-10	0	5.30263e-18	6.17132e-73	0	3.44412e-16	0	7.91806e-10	0	0	0.000227438	0	1.98007e-10	3.45271e-06	0	0.000140883	5.32162e-09	1.56466e-05	3.54167e-06	9.44071e-06	4.61791e-15	7.39345e-51	3.01362e-169	1.38532e-05	0	2.68606e-06	2.77965e-120	0.000122601	0	0.000587422	4.88781e-08
0.790604	2.17662e-10	2.69119e-111	0.00093021	0.00507906	0.000146281	0.00142612	3.09836e-12	0	3.16114e-08	0	1.47971e-08	7.40664e-10	0	6.20034e-09	0	2.65076e-08	2.31507e-90	0	0.000632946	0	1.08756e-25	1.32293e-05	5.96462e-211	0.000152514	1.56147e-08	9.34756e-05	1.57828e-05	4.01912e-05	2.91415e-06	1.11608e-14	1.48089e-49	1.33824e-05	0	3.80614e-06	8.11948e-39	0.000229637	0	0.00179465	1.06848e-07
0.954095	2.88323e-07	8.29736e-08	0.00111597	0.00874573	0.000235053	0.0137016	4.86227e-08	0	1.67528e-07	0	1.29039e-07	3.35199e-06	0	1.38896e-07	0	1.39248e-05	1.16313e-07	0	0.00145367	0	1.40998e-32	1.48569e-05	1.0291e-122	0.000527669	1.90348e-06	0.000149449	0.000113385	0.000199245	3.09676e-07	2.0309e-07	2.72107e-08	2.99959e-05	6.09098e-250	2.17892e-05	6.08078e-09	0.000423132	0	0.00232299	1.55711e-07
1	2.83238e-07	8.75017e-07	0.00118038	0.0100217	0.000278481	0.0173136	9.98045e-07	0	2.33042e-07	0	8.49944e-07	3.55582e-06	0	1.18773e-07	0	2.60395e-05	3.75017e-07	0	0.00176419	0	2.51372e-05	3.52682e-05	1.75659e-106	0.000659034	1.0983e-06	0.000186364	0.000125853	0.000162841	9.94109e-05	1.33674e-08	2.98491e-06	3.88355e-05	5.10104e-211	1.0151e-05	6.84051e-07	0.000515489	0	0.00270252	3.3595e-07
1.1514	2.83238e-07	8.75017e-07	0.00118038	0.0100217	0.000278481	0.0173136	9.98045e-07	0	2.33042e-07	0	8.49944e-07	3.55582e-06	0	1.18773e-07	0	2.60395e-05	3.75017e-07	0	0.00176419	0	2.51372e-05	3.52682e-05	1.75659e-106	0.000659034	1.0983e-06	0.000186364	0.000125853	0.000162841	9.94109e-05	1.33674e-08	2.98491e-06	3.88355e-05	5.10104e-211	1.0151e-05	6.84051e-07	0.000515489	0	0.00270252	3.3595e-07
1.3895	2.83238e-07	8.75017e-07	0.00118038	0.0100217	0.000278481	0.0173136	9.98045e-07	0	2.33042e-07	0	8.49944e-07	3.55582e-06	0	1.18773e-07	0	2.60395e-05	3.75017e-07	0	0.00176419	0	2.51372e-05	3.52682e-05	1.75659e-106	0.000659034	1.0983e-06	0.000186364	0.000125853	0.000222033	9.94109e-05	1.33674e-08	2.98491e-06	3.88355e-05	5.10104e-211	1.0151e-05	6.84051e-07	0.000515489	0	0.00270252	3.3595e-07
1.67683	0.000278196	7.40857e-06	0.0259966	0.0615395	0.00115691	0.106582	0.000197968	0	4.66534e-07	0.000174476	5.51635e-05	0.0161204	8.4582e-13	5.60793e-06	1.93906e-05	0.000318538	0.000117746	9.20613e-10	0.0042639	0	5.62946e-05	0.00264713	1.51157e-10	0.00799519	1.31931e-05	0.00033966	0.000171185	0.000222033	1.71572e-05	1.99309e-05	1.8119e-06	0.000552624	7.45131e-12	0.000223961	0.000226787	0.0048958	2.20654e-54	0.00844366	8.60483e-07
2.02359	0.000278196	7.40857e-06	0.0259966	0.0615395	0.00115691	0.106582	0.000197968	0	4.66534e-07	0.000174476	5.51635e-05	0.0161204	8.4582e-13	5.60793e-06	1.93906e-05	0.000318538	0.000117746	9.20613e-10	0.0042639	0	5.62946e-05	0.00264713	1.51157e-10	0.00799519	1.31931e-05	0.00033966	0.000171185	0.000222033	1.71572e-05	1.99309e-05	1.8119e-06	0.000552624	7.45131e-12	0.000223961	0.000226787	0.0048958	2.20654e-54	0.00844366	8.60483e-07
2.44205	0.000278196	7.40857e-06	0.0259966	0.0615395	0.00115691	0.106582	0.000197968	0	4.66534e-07	0.000174476	5.51635e-05	0.0161204	8.4582e-13	5.60793e-06	1.93906e-05	0.000318538	0.000117746	9.20613e-10	0.0042639	0	5.62946e-05	0.00264713	1.51157e-10	0.00799519	1.31931e-05	0.00033966	0.000171185	0.000249759	1.71572e-05	1.99309e-05	1.8119e-06	0.000552624	7.45131e-12	0.000223961	0.000226787	0.0048958	2.20654e-54	0.00844366	8.60483e-07
2.94705	0.00301736	2.74733e-05	0.118286	0.128034	0.00463993	0.200211	0.000645288	0	8.31143e-32	0.000111432	0.00115722	0.106011	4.96774e-06	6.30782e-05	0.00310482	0.00149284	0.000863885	5.98605e-09	0.00724077	0	9.88403e-05	0.0151414	5.05165e-05	0.021845	0.000116589	0.000610197	0.000245672	0.000338579	0.000135402	0.00065314	0.000462897	0.001905	9.06008e-06	0.00113527	0.00174118	0.0142131	8.07924e-38	0.0156094	4.42911e-06
3.55648	0.0098215	9.14908e-05	0.237833	0.186779	0.010034	0.272535	0.00248626	0	6.60287e-22	0.00010584	0.00664518	0.133203	4.25668e-06	0.000293478	0.0108516	0.00504456	0.0023538	2.17443e-09	0.0104258	0	0.000205955	0.0380289	0.000320598	0.0394988	0.000496453	0.000839004	0.000316462	0.000338579	0.00021963	0.00301674	0.0014882	0.00417683	0.00011644	0.0031344	0.00553124	0.0271006	2.96882e-05	0.0229992	5.26779e-06
4.29193	0.0098215	9.14908e-05	0.237833	0.186779	0.010034	0.272535	0.00248626	0	6.60287e-22	0.00010584	0.00664518	0.133203	4.25668e-06	0.000293478	0.0108516	0.00504456	0.0023538	2.17443e-09	0.0104258	0	0.000205955	0.0380289	0.000320598	0.0394988	0.000496453	0.000839004	0.000316462	0.000469015	0.00021963	0.00301674	0.0014882	0.00417683	0.00011644	0.0031344	0.00553124	0.0271006	2.96882e-05	0.0229992	5.26779e-06
5.17947	0.0196763	0.000185772	0.345404	0.235426	0.0174193	0.328586	0.00393508	0	1.42417e-16	0.000136898	0.0189028	0.155188	0.000191681	0.000956616	0.0116025	0.0139067	0.00449624	6.69359e-08	0.0132676	0	0.000479731	0.0688747	0.00102932	0.0606445	0.00190427	0.00122576	0.000444791	0.000551522	0.000840159	0.00719387	0.00312026	0.00735854	0.000457333	0.00630425	0.0115862	0.0423165	0.00020937	0.0308907	7.0811e-06
6.25055	0.0318341	0.000472109	0.432878	0.275637	0.025385	0.373199	0.00752343	1.27839e-302	4.80386e-13	0.00014018	0.0367158	0.182591	0.000265149	0.00307668	0.0131105	0.0308339	0.00709497	8.59633e-08	0.0166391	0	7.12196e-05	0.104404	0.00237867	0.0832813	0.00465838	0.00163669	0.000538451	0.000831506	0.00210021	0.0136354	0.00603133	0.0112828	0.0012439	0.0113675	0.0196268	0.059326	9.74959e-05	0.0389939	1.37087e-05
7.54312	0.0596813	0.00154775	0.558803	0.337825	0.0424278	0.434884	0.0180136	9.92684e-101	2.94937e-09	0.000218528	0.0801425	0.314322	0.00123446	0.0144578	0.0157162	0.102445	0.0133473	6.16901e-07	0.0227699	0	0.000172195	0.175204	0.00640595	0.130702	0.0129404	0.00299089	0.000928125	0.000993406	0.014875	0.0319819	0.0140402	0.0214552	0.00476369	0.0257547	0.0402865	0.0964049	0.000291531	0.0548376	4.58029e-05
9.10298	0.0743504	0.00276624	0.604242	0.362214	0.0506185	0.45448	0.0221984	1.50205e-59	5.30261e-09	0.000293768	0.103584	0.527195	0.00185766	0.0243461	0.0191575	0.155869	0.0168336	5.95655e-07	0.0255871	0	0.00319596	0.206198	0.00881126	0.154554	0.0183246	0.00390482	0.0011104	0.00179053	0.0259669	0.042622	0.0193596	0.0272138	0.0077841	0.0348343	0.0523174	0.115928	0.000145739	0.0623433	6.35234e-05
10.9854	0.103647	0.00454912	0.672548	0.40144	0.0657017	0.49703	0.0294625	4.98561e-20	5.57007e-07	0.000461227	0.151173	0.744776	0.005046	0.0471895	0.0218284	0.280499	0.0245628	2.58666e-06	0.03226	0	0.137346	0.256871	0.0140226	0.201921	0.030865	0.00603716	0.00153177	0.00295519	0.0501581	0.0652611	0.032524	0.0401623	0.0165343	0.0553919	0.0785543	0.156129	0.000370215	0.0762819	0.000105119
13.2571	0.132273	0.00718966	0.721116	0.431797	0.0785292	0.543359	0.0352815	6.12375e-07	1.87738e-06	0.000759924	0.196526	0.810705	0.0117963	0.0714028	0.0292067	0.413848	0.0328031	1.8373e-06	0.0388606	0	0.168845	0.294592	0.0197448	0.247979	0.04524	0.00874985	0.00232178	0.00514042	0.0752754	0.0891713	0.0486931	0.0539878	0.0284225	0.0777625	0.106667	0.197292	0.00204938	0.0886998	8.47191e-05
15.9986	0.172576	0.0177714	0.771906	0.4661	0.092518	0.625755	0.0446213	2.89434e-05	1.50036e-05	0.00151634	0.255324	0.850869	0.0449224	0.102639	0.0418044	0.597463	0.0458842	5.19072e-06	0.0478545	0	0.336043	0.334139	0.0289725	0.312618	0.0695173	0.0141581	0.00423453	0.00928114	0.118256	0.126449	0.0781169	0.0766782	0.0497905	0.1121	0.149523	0.255531	0.00292385	0.104874	0.000129043
19.307	0.209461	0.0736862	0.807146	0.492437	0.101419	0.682758	0.0513686	0.000183843	6.4693e-05	0.00279466	0.301664	0.872432	0.0959736	0.134689	0.0541532	0.726363	0.0595104	1.97437e-05	0.0574577	0	0.769684	0.360389	0.0386115	0.368712	0.0964984	0.0210129	0.0072837	0.0192574	0.160285	0.163496	0.110796	0.0992723	0.072567	0.144664	0.190531	0.307876	0.00160964	0.119134	0.000132424
23.2995	0.253831	0.223805	0.84054	0.519263	0.109342	0.74519	0.0622544	0.000808462	0.000254199	0.00512454	0.346711	0.890685	0.130499	0.19359	0.0735832	0.821875	0.0781429	3.24324e-05	0.0699888	0	0.888195	0.383434	0.0521634	0.428031	0.135481	0.0315275	0.0140348	0.0435781	0.217266	0.209659	0.155505	0.129209	0.101826	0.183388	0.24033	0.366257	0.00392381	0.136348	0.000135804
28.1177	0.302295	0.522296	0.869414	0.544449	0.11757	0.823432	0.0782916	0.00245371	0.000940623	0.00910684	0.383614	0.90539	0.165272	0.310817	0.102878	0.878877	0.10131	4.69849e-05	0.0845137	0	NaN	0.401763	0.0681956	0.480732	0.184861	0.0472859	0.0320893	0.0861527	0.283277	0.260856	0.208683	0.16441	0.134006	0.223387	0.292795	0.425686	0.00678464	0.154062	0.000181888
33.9322	0.352195	0.817811	0.893223	0.566886	0.129173	0.867641	0.0958738	0.00560794	0.00283284	0.0153362	0.40919	0.917007	0.196689	0.493925	0.141968	0.908191	0.128555	7.86741e-05	0.102158	0	NaN	0.415305	0.0851384	0.519767	0.240153	0.0678164	0.0665404	0.15488	0.357452	0.312763	0.26534	0.202495	0.166054	0.259651	0.342191	0.477672	0.0113756	0.171827	0.000318614
40.9492	0.401139	0.93091	0.912254	0.587654	0.140755	0.938327	0.106394	0.0110891	0.00688661	0.0242793	0.423304	0.926086	0.235286	0.677182	0.199708	0.922439	0.158932	0.000117067	0.122587	1.17987e-188	NaN	0.424107	0.102628	0.540417	0.297489	0.0938394	0.126834	0.249898	0.438418	0.361784	0.32024	0.241388	0.195269	0.289902	0.384352	0.526859	0.0155151	0.188481	0.000500146
49.4171	0.448696	0.963156	0.92743	0.60595	0.151817	0.960466	0.118085	0.0184068	0.0140143	0.0361909	0.42788	0.933187	0.325316	0.795484	0.296307	0.93032	0.191601	0.000209168	0.143345	3.63733e-06	NaN	0.427964	0.118733	0.550865	0.353245	0.123485	0.215576	0.396504	0.518088	0.405903	0.369857	0.278556	0.220485	0.314791	0.416551	0.57837	0.0207837	0.204718	0.000736301
59.6362	0.503429	0.976482	0.941767	0.624969	0.171146	0.9726	0.130812	0.0281806	0.0277362	0.0548296	NaN	0.939689	0.609752	0.860936	0.461875	0.936958	0.232565	0.000404444	0.167385	0.00480662	NaN	NaN	0.148871	0.556752	0.412217	0.163251	0.364969	0.537182	0.604058	0.452281	0.420817	0.317867	0.245218	0.338309	0.440156	0.640892	0.0246869	0.222543	0.0013023
71.9686	0.55162	0.983907	0.951782	0.640595	0.190324	NaN	0.149792	0.0386871	0.0462994	0.0767769	NaN	0.944194	0.78114	0.891908	0.719272	0.942058	0.273678	0.000822353	0.185485	0.0180813	NaN	NaN	0.186332	NaN	0.457287	0.2045	0.519292	0.676555	0.673523	0.490284	0.46112	0.348391	0.263322	0.356214	0.451631	0.678947	0.0242987	0.234511	0.00205116
86.8511	0.598925	0.987481	0.960051	0.654589	0.208433	NaN	0.166644	0.0517003	0.0724684	0.103696	NaN	0.946531	0.847759	0.911757	0.849526	0.94557	0.319025	0.00165423	0.21773	0.0468684	NaN	NaN	0.222804	NaN	0.498645	0.249696	0.660514	0.801504	0.736257	0.528422	0.497976	0.372762	0.277292	0.368336	0.460492	0.70188	0.0324843	0.24848	0.00342258
104.811	0.64382	0.989609	0.967073	0.667692	0.2268	NaN	0.179906	0.0658067	0.105804	0.13281	NaN	0.946541	0.881613	0.924982	0.881377	0.947443	0.365174	0.00312412	0.232704	0.0996443	NaN	NaN	0.254184	NaN	0.536944	0.295087	0.790227	0.902393	0.787973	0.567194	0.530744	0.390071	0.284766	0.372546	0.462624	0.722899	0.0201615	0.262773	0.00534851
126.486	0.682445	0.991016	0.972677	0.679696	0.241895	NaN	0.198395	0.0780304	0.144382	0.16111	NaN	0.946541	0.901207	0.9349	0.901226	0.94882	0.412272	0.00534366	NaN	0.362216	NaN	NaN	0.290393	NaN	0.572774	0.33804	0.90728	0.951527	0.828809	0.599804	0.559086	0.401826	NaN	0.375245	0.464387	0.737761	0.0371803	0.27108	0.00819757
152.642	0.721817	0.991445	0.977813	0.6904	0.265306	NaN	0.208249	0.088627	0.188671	0.184287	NaN	0.946566	0.916247	0.943272	0.917317	0.949222	0.464042	0.00879404	NaN	NaN	NaN	NaN	0.307353	NaN	0.604735	0.385665	0.962952	0.964703	0.86291	0.626287	0.581365	0.410837	NaN	0.395492	0.465933	NaN	0.045223	0.27586	0.0131127
184.207	0.755271	0.99281	0.98132	0.700362	0.282244	NaN	0.218822	0.101091	0.228083	0.197762	NaN	NaN	0.927423	0.949592	0.929377	NaN	0.512354	0.0130837	NaN	NaN	NaN	NaN	0.309063	NaN	0.633942	0.42697	0.972016	0.97236	0.888058	0.644263	0.602757	0.420368	NaN	NaN	NaN	NaN	0.0518631	0.284942	0.0198634
222.3	0.786463	0.993952	0.984283	0.710156	0.289895	NaN	0.234475	0.109112	0.257318	0.212346	NaN	NaN	0.93643	0.954767	0.939043	NaN	0.558757	0.0218075	NaN	NaN	NaN	NaN	NaN	NaN	0.661088	0.456783	0.976656	NaN	0.908021	0.653182	0.639202	0.428393	NaN	NaN	NaN	NaN	0.0625353	0.294761	0.0298033
268.27	0.81489	0.99473	0.986486	0.719129	0.301503	NaN	0.245348	NaN	0.268098	0.222409	NaN	NaN	0.943792	0.95882	0.946783	NaN	0.602925	0.036588	NaN	NaN	NaN	NaN	NaN	NaN	0.681675	0.472079	NaN	NaN	0.923283	NaN	0.659258	0.430381	NaN	NaN	NaN	NaN	0.0899554	0.311064	0.0441007
323.746	0.839357	0.995397	0.987933	0.726011	0.333135	NaN	0.247911	NaN	NaN	0.222524	NaN	NaN	0.949792	0.961117	NaN	NaN	0.644274	0.0583889	NaN	NaN	NaN	NaN	NaN	NaN	0.682912	NaN	NaN	NaN	0.934759	NaN	NaN	NaN	NaN	NaN	NaN	NaN	0.117116	NaN	0.0629717
390.694	0.861687	0.995584	0.988822	0.727821	0.358833	NaN	0.25137	NaN	NaN	NaN	NaN	NaN	0.954578	0.961489	NaN	NaN	0.684751	0.0858865	NaN	NaN	NaN	NaN	NaN	NaN	0.714848	NaN	NaN	NaN	0.94329	NaN	NaN	NaN	NaN	NaN	NaN	NaN	0.138208	NaN	0.0848857
471.487	0.885125	NaN	0.990499	NaN	0.365793	NaN	0.256367	NaN	NaN	NaN	NaN	NaN	0.958312	0.961489	NaN	NaN	0.725826	0.133781	NaN	NaN	NaN	NaN	NaN	NaN	0.717603	NaN	NaN	NaN	0.949709	NaN	NaN	NaN	NaN	NaN	NaN	NaN	0.170696	NaN	0.108034
568.987	0.897716	NaN	0.991492	NaN	0.384161	NaN	0.269547	NaN	NaN	NaN	NaN	NaN	0.959904	0.961489	NaN	NaN	0.761202	0.183964	NaN	NaN	NaN	NaN	NaN	NaN	0.75163	NaN	NaN	NaN	0.954692	NaN	NaN	NaN	NaN	NaN	NaN	NaN	0.200638	NaN	0.12961
686.649	0.909509	NaN	NaN	NaN	NaN	NaN	0.291162	NaN	NaN	NaN	NaN	NaN	NaN	0.961492	NaN	NaN	0.79669	0.225445	NaN	NaN	NaN	NaN	NaN	NaN	0.764679	NaN	NaN	NaN	0.957722	NaN	NaN	NaN	NaN	NaN	NaN	NaN	0.219951	NaN	0.151782
828.643	0.923931	NaN	NaN	NaN	NaN	NaN	0.299964	NaN	NaN	NaN	NaN	NaN	NaN	NaN	NaN	NaN	0.821786	0.286497	NaN	NaN	NaN	NaN	NaN	NaN	NaN	NaN	NaN	NaN	NaN	NaN	NaN	NaN	NaN	NaN	NaN	NaN	0.242744	NaN	0.16816
1000	NaN	NaN	NaN	NaN	NaN	NaN	NaN	NaN	NaN	NaN	NaN	NaN	NaN	NaN	NaN	NaN	0.836155	0.341424	NaN	NaN	NaN	NaN	NaN	NaN	NaN	NaN	NaN	NaN	NaN	NaN	NaN	NaN	NaN	NaN	NaN	NaN	0.285815	NaN	0.180828

## Sheet: Fig 3CD fits
Code	L	k	x0
ACT_001	0.932372	1.26801	3.98439
ACT_002	0.989775	7.21725	3.13027
ACT_003	0.968915	1.94013	1.99198
ACT_004	0.706186	1.28845	2.26486
ART_001	0.459881	0.872842	4.66341
BAC_001	1	1.37549	2.2786
BLS_001	0.298709	1.16794	4.28665
DRO_001	0.120574	2.56353	4.58506
DRO_002	0.29903	3.07448	4.84759
DRO_003	0.233421	2.64525	4.54254
DRO_004	0.446012	2.68126	2.66562
DRP_001	0.938775	3.50566	2.13126
DRP_002	0.955815	3.39237	3.95614
DRP_003	0.955553	3.55909	3.4957
DRP_004	0.952003	3.9139	4.04692
DRP_005	0.944358	3.72583	2.63708
GRA_001	0.909418	1.22969	5.004
GRA_002	0.466035	2.58391	6.53081
GRA_003	0.409187	1.23929	4.40293
IND_001	1	7.91594	4.91321
IND_002	1	6.91285	2.82911
MED_001	0.428632	2.54729	2.25106
MIC_001	0.390545	1.71081	4.31188
PAR_001	0.60391	2.06042	2.72234
ROT_001	0.739724	1.65889	4.01556
SOC_001	0.53776	1.92422	4.53892
TIS_001	1	3.58625	4.25732
TIS_002	0.999998	3.36856	4.22662
TRA_001	0.955358	1.9027	3.81193
ULT_001	0.679351	1.70798	3.65757
ULT_002	0.651708	1.87667	3.7779
ZFA_001	0.439743	1.93681	3.60177
ZFA_002	0.295363	2.49952	3.42933
ZFA_003	0.391008	2.19547	3.21543
ZFA_004	0.477579	2.34775	3.12223
ZFJ_001	0.790625	1.67365	3.25039
ZFL_002	0.476199	1.36606	6.63135
ZFL_003	0.321024	1.20866	3.41222
ZFL_004	0.206575	2.46149	6.12034

## Sheet: Fig 3E
Code	tau_1
IND_001	54.6638
DRO_001	22.1679
GRA_002	10.6152
ZFL_002	7.14556
DRO_002	7.11459
ZFA_002	4.72895
MIC_001	4.71234
DRP_002	4.48753
ULT_001	3.42191
ZFL_004	3.36098
ULT_002	3.3157
DRO_003	2.89596
DRP_003	2.69927
ROT_001	2.63017
ZFA_004	2.41107
BLS_001	2.24216
ZFA_003	2.21169
DRO_004	1.82815
IND_002	1.68072
MED_001	1.47284
DRP_001	1.36374
ACT_002	1.33355
TRA_001	1.30145
ACT_001	1.28001
DRP_004	1.27317
ZFJ_001	1.21061
SOC_001	1.15484
DRP_005	1.07871
ART_001	1.05555
TIS_001	1.00716
ZFA_001	0.926042
TIS_002	0.905504
GRA_001	0.902307
PAR_001	0.794624
BAC_001	0.723358
ZFL_003	0.568289
GRA_003	0.224738
ACT_003	0.0858915
ACT_004	0.0380487

## Sheet: Fig 3F Pinc
tau	P_inc(delta=0)	P_inc(delta=0.00023396)	P_inc(delta=0.00078663)	P_inc(delta=0.0026418)	P_inc(delta=0.0088685)	P_inc(delta=0.02978)	P_inc(delta=0.1)
0.1	0	0	0	0	0	0	0
0.120679	0	0	0	0	0	0	0
0.145635	0	0	0	0	0	0	0
0.175751	0	0	0	0	0	0	5.22955e-130
0.212095	0	0	0	0	0	0	1.4454e-08
0.255955	0	0	0	0	3.82471e-06	7.90232e-07	4.26164e-05
0.308884	0	0	0	0	1.13575e-05	3.32563e-05	0.000596028
0.372759	0	0	0	0	1.05526e-05	7.86101e-05	0.000755051
0.449843	0	1.92408e-08	2.03623e-06	1.98998e-06	1.07172e-05	0.000100097	0.000940523
0.542868	0	0.000127634	0.000413846	0.00152311	0.00452395	0.016167	0.0522232
0.655129	0	0.000219212	0.000739771	0.00261292	0.00828762	0.0283203	0.0920675
0.790604	2.69119e-111	0.000236741	0.000831451	0.00254189	0.00847903	0.0290069	0.0935921
0.954095	8.29736e-08	0.000205079	0.000793787	0.00266263	0.00833231	0.0284611	0.0934501
1	8.75017e-07	0.000248582	0.000744859	0.00260835	0.00852427	0.028416	0.0933877
1.1514	8.75017e-07	0.000248582	0.000744859	0.00260835	0.00852427	0.028416	0.0933877
1.3895	8.75017e-07	0.000248582	0.000744859	0.00260835	0.00852427	0.028416	0.0933877
1.67683	7.40857e-06	0.00048205	0.00151155	0.00508533	0.0172445	0.056125	0.175337
2.02359	7.40857e-06	0.00048205	0.00151155	0.00508533	0.0172445	0.056125	0.175337
2.44205	7.40857e-06	0.00048205	0.00151155	0.00508533	0.0172445	0.056125	0.175337
2.94705	2.74733e-05	0.00075435	0.00245304	0.00784247	0.0257489	0.0827001	0.24782
3.55648	9.14908e-05	0.000971875	0.00322579	0.0102941	0.0342577	0.108167	0.310352
4.29193	9.14908e-05	0.000971875	0.00322579	0.0102941	0.0342577	0.108167	0.310352
5.17947	0.000185772	0.00134803	0.00409769	0.0130864	0.0426956	0.132644	0.367517
6.25055	0.000472109	0.00188885	0.00516826	0.015846	0.0505943	0.157093	0.417819
7.54312	0.00154775	0.00342182	0.00770227	0.0219367	0.0681338	0.202915	0.502564
9.10298	0.00276624	0.00483755	0.00968244	0.025753	0.0768872	0.224933	0.538581
10.9854	0.00718966	0.00969759	0.0156878	0.0348613	0.0962314	0.267902	0.600219
13.2571	0.0177714	0.0207019	0.027581	0.0501794	0.120264	0.310985	0.651059
15.9986	0.0736862	0.0769416	0.0850217	0.110063	0.187184	0.389712	0.714247
19.307	0.223805	0.226865	0.234373	0.257092	0.327455	0.506389	0.771252
23.2995	0.522296	0.523972	0.528688	0.540841	0.581733	0.683891	0.833962
28.1177	0.817811	0.817747	0.818498	0.816136	0.818202	0.832023	0.883932
33.9322	0.93091	0.929973	0.928649	0.919068	0.901295	0.880222	0.906463
40.9492	0.963156	0.961689	0.958911	0.945894	0.920167	0.890553	0.918544
49.4171	0.976482	0.974596	0.971097	0.954849	0.924347	0.894464	0.928056
59.6362	0.983907	0.982104	0.978395	0.962466	0.934831	0.911446	0.939383
71.9686	0.987481	0.987044	0.985848	0.980897	0.97032	0.953335	0.956788
86.8511	0.989609	0.989489	0.989315	0.987519	0.981014	0.964681	0.963489
104.811	0.991445	0.991429	0.991497	0.990387	0.986086	0.97287	0.970239
126.486	0.99281	0.992804	0.993016	0.992506	0.990598	0.982956	0.977807
152.642	0.993952	0.993948	0.994174	0.993764	0.993068	0.988183	0.982439
184.207	0.99473	0.994727	0.994915	0.994617	0.994206	0.991276	0.985267
222.3	0.995397	0.99539	0.995481	0.995301	0.995323	0.993757	0.988647
268.27	0.995584	0.995582	0.995675	0.995517	0.995585	0.994592	0.990855
323.746	0.995426	0.995442	0.995695	0.995283	0.99563	0.995324	0.992698
390.694	0.995075	0.995079	0.995168	0.995191	0.995584	0.995399	0.993954
471.487	0.994714	0.994908	0.994639	0.995208	0.995455	0.995625	0.994736
568.987	0.995386	0.995241	0.995159	0.995382	0.994876	0.995375	0.995154
686.649	0.9944	0.994725	0.994733	0.995013	0.995194	0.994913	0.995369
828.643	0.994302	0.994634	0.994344	0.994475	0.995124	0.995392	0.995386
1000	0.992108	0.991499	0.993255	0.993435	0.992947	0.993151	0.994196

## Sheet: Fig 3F fits
Condition	L	k	x0
P_inc(delta=0)	0.991546	7.18787	3.13102
P_inc(delta=0.00023396)	0.991334	7.10761	3.12962
P_inc(delta=0.00078663)	0.991086	6.92766	3.12579
P_inc(delta=0.0026418)	0.989136	6.27702	3.11452
P_inc(delta=0.0088685)	0.988381	4.49308	3.06655
P_inc(delta=0.02978)	1	2.00771	2.82136
P_inc(delta=0.1)	1	1.26961	2.00832

## Sheet: Fig 3G
delta	L
1.84223e-06	0.989654
5.52669e-06	0.989637
2.02645e-05	0.989579
7.00047e-05	0.989531
0.000233963	0.989289
0.000786632	0.989324
0.00264176	0.985335
0.00886849	0.984643
0.0297796	1
0.0999999	1

## Sheet: Fig 3H
delta	k
1.84223e-06	7.22041
5.52669e-06	7.21909
2.02645e-05	7.21349
7.00047e-05	7.19968
0.000233963	7.14322
0.000786632	6.95766
0.00264176	6.33936
0.00886849	4.54517
0.0297796	2.00805
0.0999999	1.26967

## Sheet: Fig 3I
delta	tau_0
1.84223e-06	22.879
5.52669e-06	22.8778
2.02645e-05	22.8775
7.00047e-05	22.8677
0.000233963	22.8455
0.000786632	22.7605
0.00264176	22.4827
0.00886849	21.4197
0.0297796	16.7998
0.0999999	7.45077

[truncated: 14 more sheets: Fig 4C, Fig 4D, Fig 4E, Fig 4FG, Fig 4HIJ, Fig 4K P_inc, Fig 4K P_swap, Fig 5, S2 Fig, S5B Fig ACT_002, S5B Fig DRP_001, S5B Fig ZFJ_001, S5C Fig, S5D Fig]
